# Supplementary material for: Laser Imaging Nephelometer for aircraft deployment
Source: Copernicus journal article supplement (doi:10.5194/amt-2021-251), 2021-08-30
Supplement: Supplementary file [file amt-2021-251-AC3-supplement.pdf]

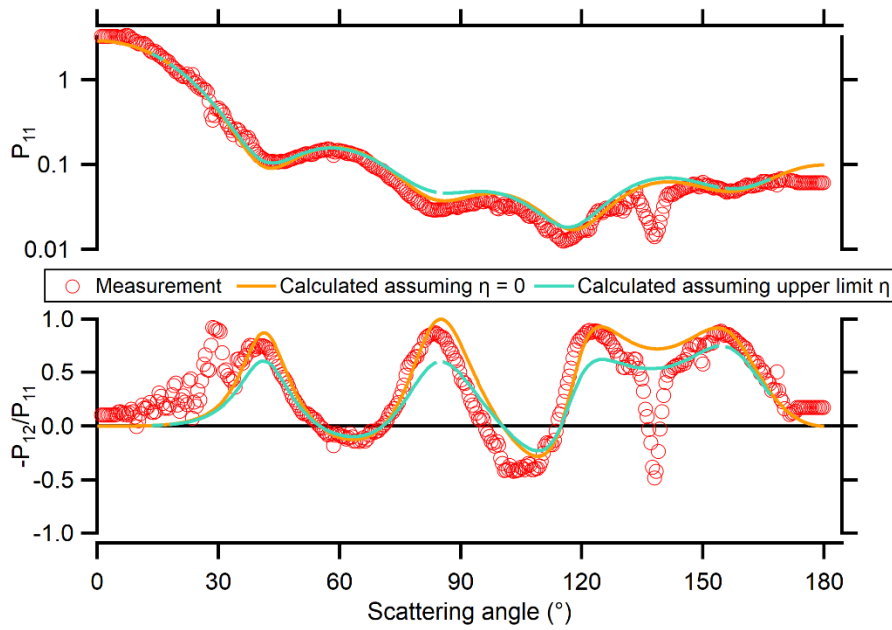

**Figure 4. Phase function ( $P_{11}$ , top) and degree of linear polarization ( $-P_{12}/P_{11}$ , bottom) for  $\lambda = 660$  nm light scattered by  $D_p = 900$  nm PSLs. Measurements are shown as red circles and the values calculated from Mie theory are shown as solid lines. The gold line shows the values calculated if scattering plane rotation ( $\eta$ ) is assumed to be zero. If we use an upper estimate of  $\eta$ , Mie theory predicts that the observations would follow the teal line. Stray light from the inside of the instrument introduces noise at scattering angles around  $30^\circ$  and  $135^\circ$  for both data products.**
